# Supplementary material for: Alloy-assisted deposition of three-dimensional arrays of atomic gold catalyst for crystal growth studies
Source: PubMed Central journal article supplement (PMC5722855; doi:10.1038/s41467-017-02025-x), 2017-12-08
Supplement: 41467_2017_2025_MOESM2_ESM.pdf [file 41467_2017_2025_MOESM2_ESM.pdf]

## Description of Additional Supplementary Files

File Name: Supplementary Movie 1

Description: *Ab initio* molecular dynamics (AIMD) simulation of a model Si(111) surface with an isolated surface Au atom. An Au atom was placed on a Si site in the initial structure. 10 molecules each of HF and H<sub>2</sub>O<sub>2</sub> were placed randomly on the (111) surface of Si. Total duration: 50 ps.

File Name: Supplementary Movie 2

Description: *Ab initio* molecular dynamics (AIMD) simulation of a model Si(111) surface. 10 molecules each of HF and H<sub>2</sub>O<sub>2</sub> were placed randomly on the (111) surface of Si. Total duration: 50 ps.
